# Supplementary material for: Frequent implementation of interventions may increase HIV infections among MSM in China
Source: PubMed Central journal article supplement (PMC5765000; doi:10.1038/s41598-017-18743-7), 2018-01-11
Supplement: 41598_2017_18743_MOESM1_ESM.pdf [file 41598_2017_18743_MOESM1_ESM.pdf]

# Frequent implementation of interventions may increase HIV infections among MSM in China

Xiaodan Sun, Yanni Xiao, <sup>1</sup> Zhihang peng, Ning Wang

## 1 Existence of the periodic disease-free equilibrium

We can show that system (2)-(3) has a disease-free periodic solution.

**Lemma A.1** *System (2)-(3) has a  $T_l$ -periodic solution  $\hat{S}(t) = (\hat{S}_1(t), 0, 0, 0, \dots, \hat{S}_i(t), 0, 0, 0, \dots, \hat{S}_n(t), 0, 0, 0)$ .*

**Proof** To show the existence of disease-free periodic solution of system (2)-(3), we consider the following disease-free subsystem.

$$\begin{cases} \frac{dS_i}{dt} = U_i - (\mu_i + \sigma_i(t) + d)S_i, \\ \frac{d\sigma_i(t)}{dt} = -r_i^\sigma \sigma_i(t), & t \neq kT_l, \\ \sigma_i(T_l^+) = \sigma_i^m, & t = kT_l. \end{cases} \quad (\text{S.1})$$

Let  $S(t) = (S_1(t), S_2(t), \dots, S_n(t))$ ,  $U = (U_1, U_2, \dots, U_n)$ ,  $\mu = (\mu_1, \mu_2, \dots, \mu_n)$  and  $\sigma(t) = (\sigma_1(t), \sigma_2(t), \dots, \sigma_n(t))$ , where  $\sigma_i(t) = \sigma_i^0 e^{-r_i^\sigma(t-kT_l)}$ ,  $k = 1, 2, \dots, kT_l \leq t < (k+1)T_l$ , we have

$$\frac{dS(t)}{dt} = U - (\mu + \sigma(t) + d)S(t), \quad t \neq kT_l. \quad (\text{S.2})$$

Clearly, (S.2) has a unique positive  $T_l$  periodic solution

$$\hat{S}(t) = e^{-\int_0^t (\mu + \sigma(s) + d) ds} \left( \hat{S}(0) + U \int_0^t e^{\int_0^s (\mu + \sigma(\xi) + d) d\xi} ds \right).$$

which is globally attractive in  $R_+^n$ , where

$$\hat{S}(0) = \frac{U \int_0^{T_l} e^{\int_0^s (\mu + \sigma(\xi) + d) d\xi} ds}{e^{\int_0^{T_l} (\mu + \sigma(s) + d) ds} - 1}.$$

Thus, system (2)-(3) has a unique disease free periodic solution  $x^*(t) = (\hat{S}_1(t), 0, 0, 0, \dots, \hat{S}_i(t), 0, 0, 0, \dots, \hat{S}_n(t), 0, 0, 0)$ .

---

<sup>1</sup>Corresponding author. E-mail: yxiao@mail.xjtu.edu.cn

## 2 The basic reproduction number

In the following, we define the basic reproduction number of (2)-(3) by using the theory proposed by Wang and Zhao.<sup>1</sup> System (2)-(3) is equivalent to the following system

$$\frac{d}{dt}x(t) = \mathcal{F}(t, x) - \mathcal{V}(t, x). \quad (\text{S.3})$$

where  $x = (I_1, D_{I1}, D_{A1}, \dots, I_i, D_{Ii}, D_{Ai}, \dots, I_n, D_{In}, D_{An}, S_1, \dots, S_i, \dots, S_n)$ ,

$$\mathcal{F}(t, x) = \begin{pmatrix} B_1(t) \\ 0 \\ 0 \\ \vdots \\ B_n(t) \\ 0 \\ 0 \\ 0 \\ \vdots \\ 0 \end{pmatrix}, \quad \mathcal{V}(t, x) = \begin{pmatrix} (d + \delta_1)I_1 \\ -\rho\delta_1 I_1 + (\xi + d + \alpha_I) \\ -(1 - \rho)\delta_1 I_1 - \xi D_{I1} + (d + \alpha_A)D_{A1} \\ \vdots \\ (d + \delta_n)I_n \\ -\rho\delta_n I_n + (\xi + d + \alpha_I) \\ -(1 - \rho)\delta_n I_n - \xi D_{In} + (d + \alpha_A)D_{An} \\ -U_1 + B_1(t) + (\mu_1(t) + d)S_1 \\ \vdots \\ -U_n + B_n(t) + (\mu_n(t) + d)S_1 \end{pmatrix},$$

with  $B_i(t) = \beta_{ii}(1 - v_{ii}(t))S_i \frac{I_i + \varrho D_{Ii} + \epsilon D_{Ai}}{N_i} + \sum_{j \neq i}^n \beta_{ij} m_{ij} v_{ij}(t) S_i \frac{I_j + \varrho D_{Ij} + \epsilon D_{Aj}}{N_j}$ .

It is obvious that conditions (A1)-(A5) in reference<sup>1</sup> are satisfied. Let  $f(t, x(t)) = \mathcal{F}(t, x) - \mathcal{V}(t, x)$  and  $\tilde{M}(t) = (\frac{\partial f_i(t, x^*(t))}{\partial x_j})_{3n+1 \leq i, j \leq 4n}$ , where  $x^*(t) = (0, 0, 0, \dots, 0, 0, 0, S_1^*, \dots, S_i^*, \dots, S_n^*)$  is the disease-free periodic solution and  $x_i$  is the  $i$ -th component of  $f(t, x(t))$  respectively. Then we have

$$\tilde{M}(t) = \begin{pmatrix} -(\mu_1 + \sigma_1(t) + d) & 0 & \cdots & 0 \\ 0 & -(\mu_2 + \sigma_2(t) + d) & \cdots & 0 \\ \vdots & \vdots & \ddots & \vdots \\ 0 & 0 & \cdots & -(\mu_n + \sigma_n(t) + d) \end{pmatrix},$$

and it is easy to obtain that  $r(\Phi_{\tilde{M}}(\omega)) < 1$ , where  $\Phi_M(t)$  is the monodromy matrix of the linear  $T_l$ -period system  $\frac{dy}{dt} = \tilde{M}(t)y$  and  $r(\Phi_{\tilde{M}}(\omega))$  is the spectral radius of  $\Phi_{\tilde{M}}(\omega)$ . Thus, the condition (A6) in reference<sup>1</sup> also holds.

Let  $F(t) = (\frac{\partial \mathcal{F}_i(t, x^*(t))}{\partial x_j})_{1 \leq i, j \leq 3n}$  and  $V(t) = (\frac{\partial \mathcal{V}_i(t, x^*(t))}{\partial x_j})_{1 \leq i, j \leq 3n}$ , where  $\mathcal{F}_i(t, x)$  and  $\mathcal{V}_i(t, x)$  are

the  $i$ -th component of  $\mathcal{F}(t, x)$  and  $\mathcal{V}(t, x)$ , respectively. Then, we have

$$F(t) = \begin{pmatrix} A_{11}(t) & A_{11}(t)\varrho & A_{11}(t)\epsilon & \cdots & A_{1n}(t) & A_{1n}(t)\varrho & A_{1n}(t)\epsilon \\ 0 & 0 & 0 & \cdots & 0 & 0 & 0 \\ 0 & 0 & 0 & \cdots & 0 & 0 & 0 \\ \vdots & \vdots & \vdots & \ddots & \vdots & \vdots & \vdots \\ A_{n1}(t) & A_{n1}(t)\varrho & A_{n1}(t)\epsilon & \cdots & A_{nn}(t) & A_{nn}(t)\varrho & A_{nn}(t)\epsilon \\ 0 & 0 & 0 & \cdots & 0 & 0 & 0 \\ 0 & 0 & 0 & \cdots & 0 & 0 & 0 \end{pmatrix},$$

and

$$V = \begin{pmatrix} d + \delta_1 & 0 & 0 & \cdots & 0 & 0 & 0 \\ -\rho\delta_1 & \xi + d + \alpha_I & 0 & \cdots & 0 & 0 & 0 \\ -(1 - \rho)\delta_1 & -\xi & d + \alpha_A & \cdots & 0 & 0 & 0 \\ \cdots & \cdots & \cdots & \ddots & \cdots & \cdots & \cdots \\ 0 & 0 & 0 & \cdots & d + \delta_n & 0 & 0 \\ 0 & 0 & 0 & \cdots & -\rho\delta_n & \xi + d + \alpha_I & 0 \\ 0 & 0 & 0 & \cdots & -(1 - \rho)\delta_n & -\xi & d + \alpha_A \end{pmatrix},$$

where  $A_{ii} = \beta_{ii}(1 - v_{ii}(t))$ ,  $i = 1, \dots, n$ ,  $A_{ij} = \beta_{ij}m_{ij}v_{ij}(t)\frac{\hat{N}_i(t)}{\hat{N}_j(t)}$ ,  $i, j = 1, \dots, n$ , and  $\hat{N}_i(t) = \frac{U_i}{\mu_i + \sigma_i(t) + d}$ .

Let  $Y(t, x)$  be a  $3n \times 3n$  matrix solution of the following system.

$$\frac{dY(t, s)}{dt} = -V(t)Y(t, s), \text{ for any } t \geq s, Y(s, s) = I,$$

where  $I$  is a  $3n \times 3n$  identity matrix. Therefore, the condition (A7) in reference<sup>1</sup> holds.

Define  $\psi(t)$  as the initial periodic distribution of infected individuals with periodic  $T_l$ . Then, the distribution of infected individuals infected at time  $s$  and are still infected individuals at time  $t$  can be given by  $Y(t, s)F(s)\psi(s)$ . Let  $C_{T_l}$  be the ordered Banach space of all  $T_l$ -periodic functions from  $\mathbb{R}$  to  $\mathbb{R}^{3n}$ , which is equipped with the maximum norm  $\|\cdot\|$  and the positive cone  $C_{T_l}^+ := \{\psi \in C_{T_l} : \psi(t) \geq 0, \forall t \in \mathbb{R}\}$ . A linear operator  $L : C_{T_l} \rightarrow C_{T_l}$  is defined as follows.

$$(L\psi)(t) = \int_0^\infty Y(t, t-a)F(t-a)\psi(t-a)da, \forall t \in \mathbb{R}, \psi \in C_{T_l}.$$

Then, we can define the basic reproduction number as

$$R_0 := \rho(L).$$

From Wang and Zhao,<sup>1</sup> we have the following Lemma.

**Lemma S1**(See<sup>1</sup>) The following statements are valid:

- If  $r(W(T_l, \lambda)) = 1$  has a positive solution  $\lambda_0$ , then  $\lambda_0$  is an eigenvalue of  $L$ , and hence  $R_0 > 0$ .
- If  $R_0 > 0$ , then  $\lambda = R_0$  is the unique solution of  $r(W(T_l, \lambda)) = 1$ .
- $R_0 = 0$  if and only if  $r(W(T_l, \lambda)) < 1$  for all  $\lambda > 0$ .

On the basis of this Lemma, we can calculate the basic reproduction number numerically by finding the positive solution  $\lambda_0$  of  $r(W(T_l, \lambda)) = 1$ .

### 3 Effects of interventions on HIV infections

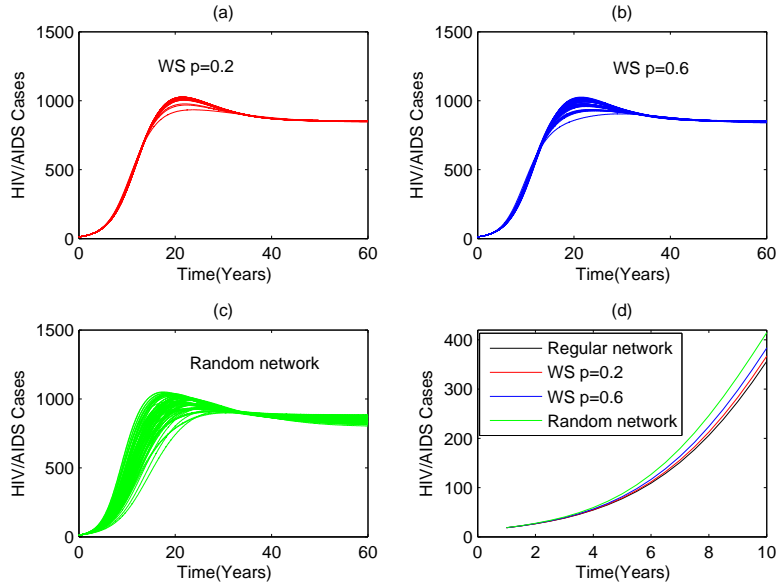

Figure S1: **Effects of the network structures on the number of HIV/AIDS cases of each community.** The number of communities is  $n = 10$  and each community has a mean of  $k = 2$  neighbours. The maximum within-community impacts of interventions are  $v_{ii}^m = 0.5$ , and the maximum between-community impacts are  $v_{between}^* = 0.5$ . For each network structure 100 simulations are conducted. (a) WS network with rewired probability of  $p = 0.2$ . (b) WS network with rewired probability of  $p = 0.6$ . (c) Random network. Here,  $T_l = 1/2$ ,  $\sigma_i^m = 0.02$ ,  $r_{ii}^v = r_{ij}^v = 2$ ,  $r_i^\sigma = 2$ . Other parameters are described in Table 1 in the main text.

## References

1. Wang, W. & Zhao, X. Q. Threshold dynamics for compartmental epidemic models in periodic environments. *J. Dynam. Diff. Equ.* **20**, 699-717 (2008).
